# Supplementary material for: One-pot synthesis of Li2FePO4F nanoparticles via a supercritical fluid process and characterization for application in lithium-ion batteries
Source: Royal Society of Chemistry journal article supplement (doi:10.1039/c3ra42686f), 2013-01-01
Supplement: c3ra42686f.pdf [file c3ra42686f.pdf]

### Supporting information

## One-pot synthesis of $\text{Li}_2\text{FePO}_4\text{F}$ nanoparticles via supercritical fluid process and characterization for lithium ion battery

M.K.Devaraju\* and I. Honma\*

Institute of Multidisciplinary Research for Advanced Materials, Tohoku University,

2-1-1, Katahira, Aoba-ku, Sendai 980-8577, Japan.

Fax: +81-22-217-5828; Tel: +81-22-217-5816;

E-mail: [devarajumk@rediffmail.com](mailto:devarajumk@rediffmail.com); [i.honma@tagen.tohoku.ac.jp](mailto:i.honma@tagen.tohoku.ac.jp)

### Experimental

$\text{Li}_2\text{FePO}_4\text{F}$  nanoparticles were synthesized from Iron chloride (II) tetrahydrate ( $\text{FeCl}_2 \cdot 4\text{H}_2\text{O}$ , Wako, Japan), orthophosphoric acid ( $\text{H}_3\text{PO}_4$  Wako, Japan) and lithium fluoride ( $\text{LiF}$  Wako, Japan) in 1:1:4 molar ratios. Ascorbic (Wako, Japan) was used as reducing agent. First,  $\text{FeCl}_2 \cdot 4\text{H}_2\text{O}$  and  $\text{H}_3\text{PO}_4$  were dissolved in mixed solvents of water and ethylene glycol (70:30 volume ratio) and  $\text{LiF}$  was separately dissolved in diluted hydrochloric acid ( $\text{HCl}$ ) with constant stirring at  $70\text{ }^\circ\text{C}$  for 1h ( $\text{LiF}$  is not soluble in water, so  $\text{HCl}$  was used) the solution was stirred for 30-40 min and then both solution was mixed together, followed by addition of ascorbic acid. Later, the solution mixture (5 ml) was transferred to batch reactors (4 reactors, each 10 ml volume) followed by heating at  $400\text{ }^\circ\text{C}$  at high pressure (38 MPa) for about 10-30 min and then reactors were quenched in cold water, the products were recovered through repeated washings using ethanol and water.

### Characterization

The powder X-ray diffraction (XRD) analysis was carried out with a Bruker AXS D8 Advance instrument using  $\text{Cu K}\alpha$  radiation. Transmission electron microscopy (JEOL

TEM-2100F), Energy dispersive spectroscopy (EDS) was carried out using SU 8000, Hitachi, Japan. TG analysis was performed using TG-DTA 2000S to know the exact carbon content in  $\text{Li}_2\text{MnSiO}_4$

### **Electrochemical measurements**

Carbon coating was carried out prior to electrochemical measurements. Active materials was mixed with known amount of carbon materials (acetylene black), the mixture was put into ball milling pot and ball milling process was carried out for above 3h with 240 rpm. After that, the sample was recovered and vacuum dried. Later, the vacuum dried cathode material was ground well with 10 wt% PTFE (poly(tetrafluoroethylene)) binder to make the electrode paste. The weight ratio of active material, acetylene black and PTFE were 80:10:10. The prepared paste was spread uniformly on a  $1\text{ cm}^2$  SUS metal (100 mesh) using the doctor-blade method. The cathode loading was  $5\text{--}7\text{ mgcm}^{-2}$ . Li metal on a SUS metal mesh was used as a counter and reference electrodes. The electrolyte consist the solution of (18 to 20 ml) 1M  $\text{LiPF}_6$  in ethylene carbonate (EC)/diethyl carbonate (DEC) (1/1 by volume). The cell assembly was carried out in a glove box filled with high purity argon gas. The electrochemical performances of the prepared electrode was characterized by galvanostatic charge-discharge (HOKUTO DENKO, Japan) in a potential range between 1.8 V to 4.5 V vs  $\text{Li/Li}^+$ .

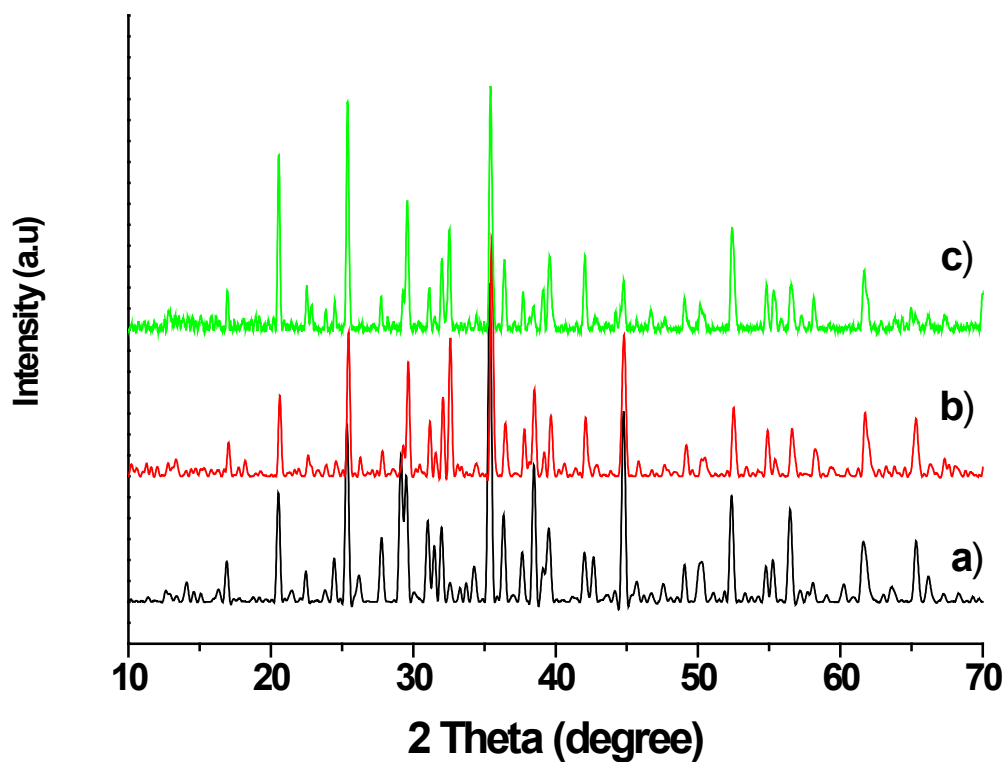

**Fig. S1** XRD pattern of as-synthesized particles at 400 °C for 30 min, a) in water, b) ethanol and c) water/ethanol. Majority of the diffraction peaks are matching to LiFePO<sub>4</sub> phase compared with JCPDS#40-11499

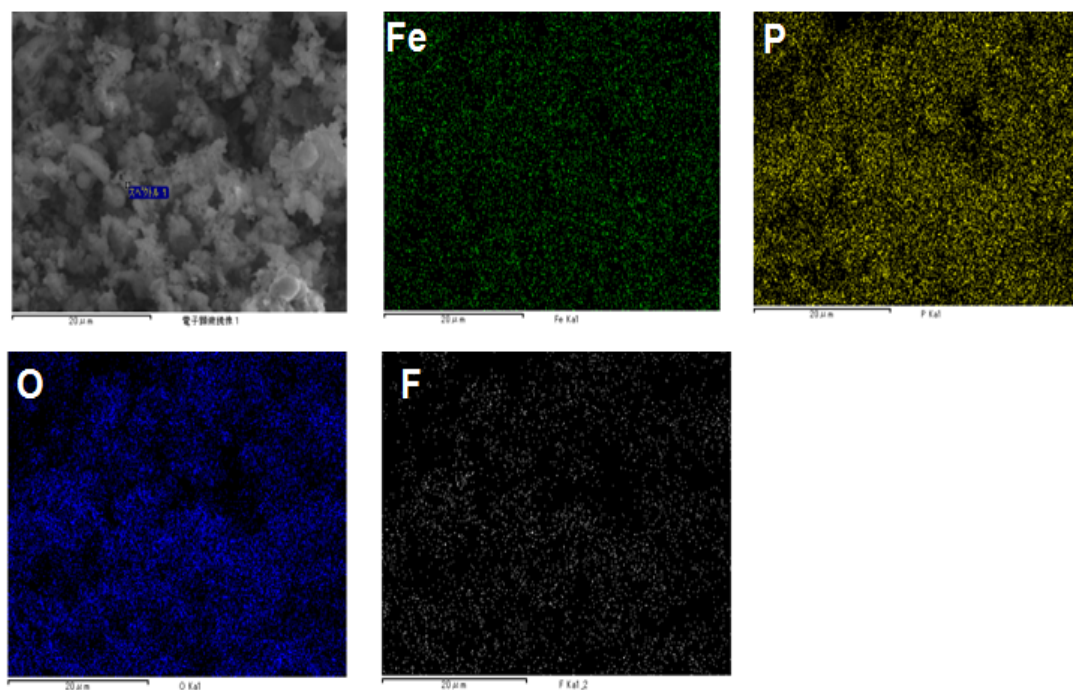

**Fig. S2** SEM image and elemental mapping of as-synthesized  $\text{Li}_2\text{FePO}_4\text{F}$  nanoparticles at 400 °C for 10 min. Mapping of Fe, P, O and F can be observed.

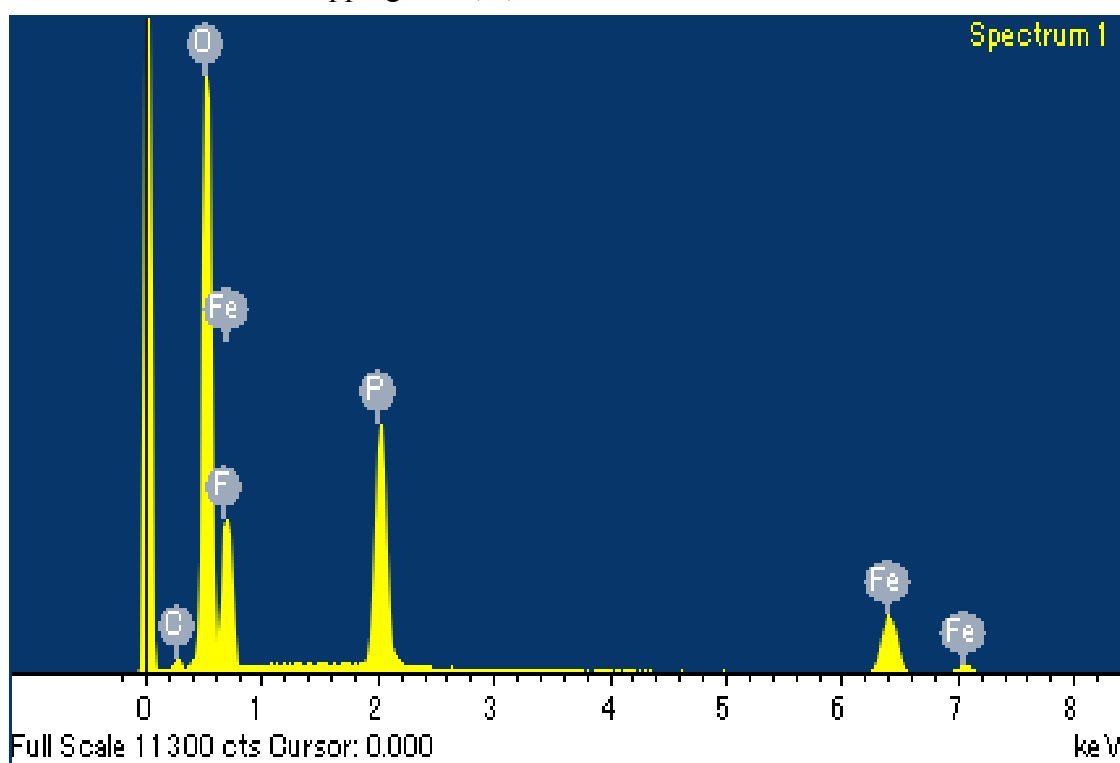

**Fig. S3** EDS Spectra of  $\text{Li}_2\text{FePO}_4\text{F}$  nanoparticles synthesized at 400 °C for 30 min, showing the presence of Fe, P, O and F and confirming the formation of  $\text{Li}_2\text{FePO}_4\text{F}$  phase.

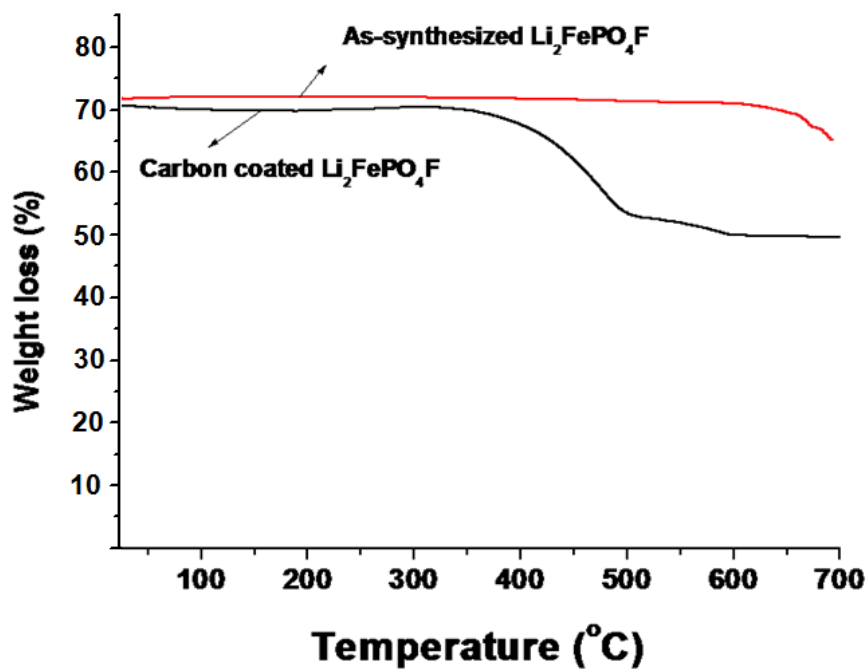

**Fig. S4** TG analysis of as-synthesized and carbon coated Li<sub>2</sub>FePO<sub>4</sub>F nanoparticles at 400 °C for 30 min.

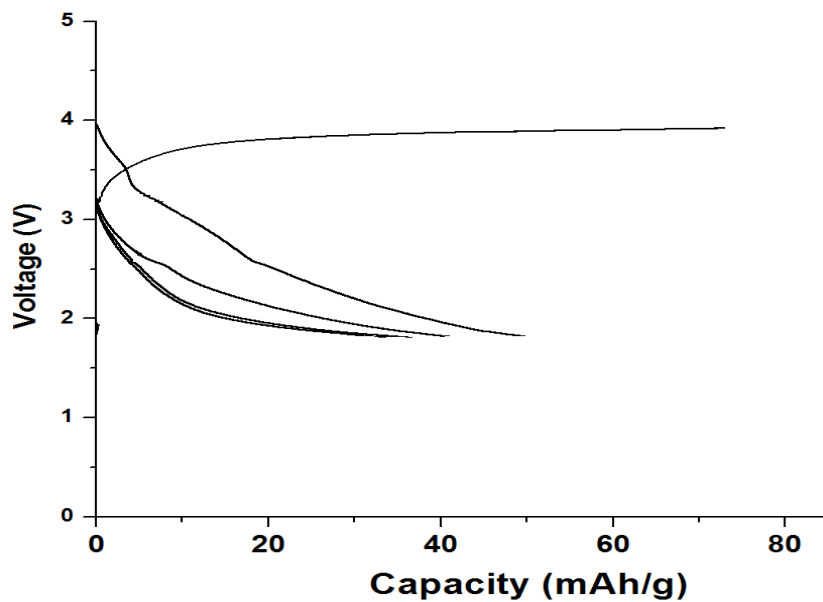

**Fig. S5** Charge discharge of as synthesized Li<sub>2</sub>FePO<sub>4</sub>F at 400 °C for 30 min via supercritical fluid process.
